# Supplementary material for: The properties and catalytic performance of PtSn/Mg(x-Ga)AlO catalysts for ethane dehydrogenation
Source: Royal Society of Chemistry journal article supplement (doi:10.1039/c7ra00670e), 2017-01-01
Supplement: c7ra00670e1.pdf [file c7ra00670e1.pdf]

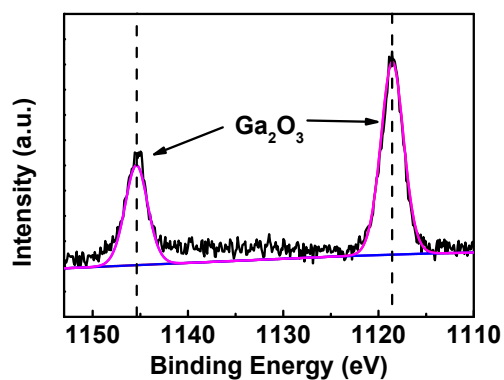

Fig. S1 The XPS spectra of Ga2p for PtSn/Mg(2-Ga)AlO catalyst

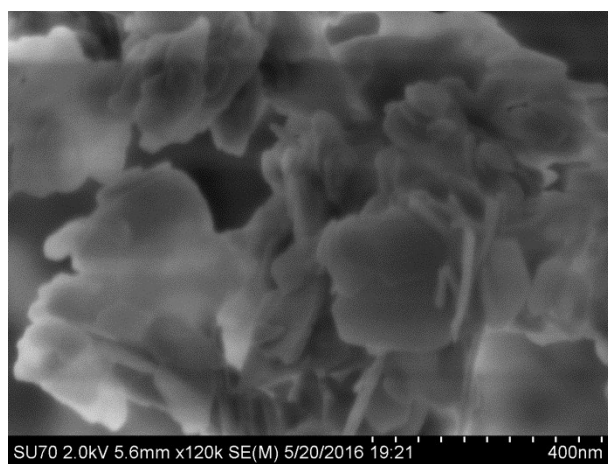

Fig. S2 SEM image of reduced catalyst PtSn/Mg(2-Ga)AlO
